# Supplementary material for: A novel genotype of Hantaan orthohantavirus harbored by Apodemus agrarius chejuensis as a potential etiologic agent of hemorrhagic fever with renal syndrome in Republic of Korea
Source: PubMed Central journal article supplement (PMC8143423; doi:10.1371/journal.pntd.0009400), 2021-05-12
Supplement: pntd.0009400.s004.pdf [file pntd.0009400.s004.pdf]

1 **S1 Table. Summary of mapped reads and depth of coverages by Hantaan virus (HTNV) multiplex PCR-based next-generation sequencing.**

| Sample         | Total reads      | Mapped reads /<br>Total reads (%) | L segment           |                   | M segment             |                   | S segment             |                   |
|----------------|------------------|-----------------------------------|---------------------|-------------------|-----------------------|-------------------|-----------------------|-------------------|
|                |                  |                                   | Mapped reads (%)    | Depth of coverage | Mapped reads (%)      | Depth of coverage | Mapped reads (%)      | Depth of coverage |
| Ac19-6         | 720,838          | 11.8                              | 2,794 (0.4)         | 64.6              | 35,966 (5.0)          | 1,501.9           | 46,629 (6.5)          | 4,151.5           |
| Ac20-5         | 2,287,084        | 56.3                              | 21,516 (0.9)        | 497.3             | 755,097 (33.0)        | 31,532.0          | 511,299 (22.4)        | 45,522.5          |
| Ac20-6         | 1,597,734        | 28.5                              | 6,276 (0.4)         | 145.1             | 27,269 (17.1)         | 1,138.7           | 421,325 (26.4)        | 37,511.8          |
| Ac20-30        | 1,141,262        | 44.6                              | 30,952 (2.7)        | 715.4             | 297,141 (26.0)        | 12,408.3          | 180,933 (15.9)        | 16,109.0          |
| Ac20-31        | 1,547,806        | 32.5                              | 32,313 (2.1)        | 746.9             | 359,727 (23.2)        | 15,021.8          | 111,552 (7.2)         | 9,931.8           |
| Ac20-32        | 2,615,908        | 30.5                              | 53,036 (2.0)        | 1,225.8           | 549,311 (21.0)        | 22,938.6          | 195,606 (7.5)         | 17,415.4          |
| <b>Average</b> | <b>1,651,772</b> | <b>34.0</b>                       | <b>24,481 (1.5)</b> | <b>565.9</b>      | <b>337,419 (20.4)</b> | <b>16,607.9</b>   | <b>244,557 (14.8)</b> | <b>21,773.7</b>   |

2 Ac, *Apodemus chejuensis*; C<sub>i</sub>, cycle threshold; L, large; M, medium; S, small.

3 The depth of coverage was determined by the number of mapped reads (read length × number of reads matching the reference/reference genome size).
