# Supplementary material for: A novel genotype of Hantaan orthohantavirus harbored by Apodemus agrarius chejuensis as a potential etiologic agent of hemorrhagic fever with renal syndrome in Republic of Korea
Source: PubMed Central journal article supplement (PMC8143423; doi:10.1371/journal.pntd.0009400), 2021-05-12
Supplement: pntd.0009400.s006.pdf [file pntd.0009400.s006.pdf]

1 **S3 Table. Percentage similarity based on M segment of HTNV nucleotide and amino acid sequences**  
 2 **between HTNV from Jeju Island and representative rodent-borne orthohantaviruses.**

| Sample<br>(Host) | Homology (%)         |        |                      |        |                        |        |                        |        |
|------------------|----------------------|--------|----------------------|--------|------------------------|--------|------------------------|--------|
|                  | HTNV                 |        | HTNV                 |        | SOOV                   |        | SEOV                   |        |
|                  | 76-118               |        | HV004                |        | SC1                    |        | 80-39                  |        |
|                  | <i>(A. agrarius)</i> |        | <i>(A. agrarius)</i> |        | <i>(A. peninsulae)</i> |        | <i>(R. norvegicus)</i> |        |
|                  | nt (%)               | aa (%) | nt (%)               | aa (%) | nt (%)                 | aa (%) | nt (%)                 | aa (%) |
| Ac19-6           | 88.3                 | 97.6   | 84.0                 | 96.7   | 80.1                   | 90.9   | 70.8                   | 76.9   |
| Ac20-5           | 87.2                 | 97.5   | 83.8                 | 96.8   | 80.3                   | 91.2   | 70.9                   | 76.6   |
| Ac20-6           | 88.8                 | 98.2   | 83.9                 | 97.1   | 80.4                   | 91.5   | 70.9                   | 77.0   |
| Ac20-30          | 87.3                 | 97.7   | 83.9                 | 97.0   | 80.3                   | 91.5   | 71.0                   | 76.9   |
| Ac20-31          | 87.3                 | 97.6   | 83.9                 | 97.0   | 80.3                   | 91.5   | 71.0                   | 76.8   |
| Ac20-32          | 87.4                 | 97.7   | 83.9                 | 97.0   | 80.3                   | 91.5   | 71.0                   | 76.9   |

3 *Ac, Apodemus chejuensis*; HTNV, Hantaan virus; SOOV, Soochong virus; SEOV, Seoul virus; nt, nucleotide; aa, amino acid.
