# Supplementary material for: A novel genotype of Hantaan orthohantavirus harbored by Apodemus agrarius chejuensis as a potential etiologic agent of hemorrhagic fever with renal syndrome in Republic of Korea
Source: PubMed Central journal article supplement (PMC8143423; doi:10.1371/journal.pntd.0009400), 2021-05-12
Supplement: pntd.0009400.s007.pdf [file pntd.0009400.s007.pdf]

1 **S4 Table. Percentage similarity based on S segment of HTNV nucleotide and amino acid sequences**  
 2 **between HTNV from Jeju Island and representative rodent-borne orthohantaviruses.**

| Sample<br>(Host) | Homology (%)         |        |                      |        |                        |        |                        |        |
|------------------|----------------------|--------|----------------------|--------|------------------------|--------|------------------------|--------|
|                  | HTNV                 |        | HTNV                 |        | SOOV                   |        | SEOV                   |        |
|                  | 76-118               |        | HV004                |        | SC1                    |        | 80-39                  |        |
|                  | <i>(A. agrarius)</i> |        | <i>(A. agrarius)</i> |        | <i>(A. peninsulae)</i> |        | <i>(R. norvegicus)</i> |        |
|                  | nt (%)               | aa (%) | nt (%)               | aa (%) | nt (%)                 | aa (%) | nt (%)                 | aa (%) |
| Ac19-6           | 85.4                 | 96.3   | 85.3                 | 97.2   | 84.3                   | 96.3   | 69.6                   | 82.3   |
| Ac20-5           | 84.8                 | 96.5   | 85.0                 | 97.4   | 84.5                   | 96.5   | 69.7                   | 82.5   |
| Ac20-6           | 84.9                 | 96.5   | 85.1                 | 97.4   | 84.6                   | 96.5   | 69.7                   | 82.5   |
| Ac20-30          | 85.4                 | 96.3   | 85.3                 | 97.2   | 84.6                   | 96.3   | 69.6                   | 82.3   |
| Ac20-31          | 85.1                 | 96.5   | 85.1                 | 97.0   | 84.8                   | 96.0   | 69.8                   | 82.5   |
| Ac20-32          | 85.1                 | 96.7   | 85.1                 | 97.2   | 84.5                   | 96.3   | 69.6                   | 82.8   |

3 *Ac, Apodemus chejuensis*; HTNV, Hantaan virus; SOOV, Soochong virus; SEOV, Seoul virus; nt, nucleotide; aa, amino acid.
