# Supplementary material for: A novel genotype of Hantaan orthohantavirus harbored by Apodemus agrarius chejuensis as a potential etiologic agent of hemorrhagic fever with renal syndrome in Republic of Korea
Source: PubMed Central journal article supplement (PMC8143423; doi:10.1371/journal.pntd.0009400), 2021-05-12
Supplement: pntd.0009400.s008.pdf [file pntd.0009400.s008.pdf]

**S5 Table. Topography and GPS coordinates of the trapping sites.**

| Year | Trapping site | Topography                                  | GPS coordinates                |
|------|---------------|---------------------------------------------|--------------------------------|
| 2018 | Ara-dong      | herbaceous vegetations, Hill, and mountains | 33°27'55" N 126°32'45" E       |
|      | Aewol-eup     | herbaceous vegetations and farmlands        | 33°26'6" N 126°20'32" E        |
|      | Ora-dong      | unmanaged grasses, mountains, and forests   | 33°27'12" N 126°30'38" E       |
| 2019 | Haengwon-ri   | unmanaged grasses, farmlands                | 33°33'3" N 126°48'41" E        |
|      | Ora-dong      | unmanaged grasses, mountains, and forests   | 33°27'11" N 126°30'38" E       |
| 2020 | Bongseong-ri  | herbaceous vegetations and farmlands        | 33°24'51" N 126°18'19" E       |
|      | Haengwon-ri   | unmanaged grasses, farmlands                | 33°33'4" N 126°48'41" E        |
|      | Ora-dong      | Field and forest                            | 33°27'09.31" N 126°30'39.10" E |
|      | Yongsu-ri     | unmanaged grasses, farmlands                | 33°19'3" N 126°10'50" E        |
