# Supplementary material for: A novel genotype of Hantaan orthohantavirus harbored by Apodemus agrarius chejuensis as a potential etiologic agent of hemorrhagic fever with renal syndrome in Republic of Korea
Source: PubMed Central journal article supplement (PMC8143423; doi:10.1371/journal.pntd.0009400), 2021-05-12
Supplement: pntd.0009400.s009.pdf [file pntd.0009400.s009.pdf]

**S6 Table. Oligonucleotide primer sequences generated in this study.**

| Target segment | Primer name                    | Primer sequence (5' → 3')                | Product size (bp) | Reference |
|----------------|--------------------------------|------------------------------------------|-------------------|-----------|
| L segment      | HAN-L-F1 <sup>a</sup>          | 5'-ATG TAY GTB AGT GCW GAT GC-3'         | 452               | [1]       |
|                | HAN-L-R1 <sup>a</sup>          | 5'-AAC CAD TCW GTY CCR TCA TC-3'         |                   |           |
|                | HAN-L-F2 <sup>a</sup>          | 5'-TGC WGA TGC HAC IAA RTG GTC-3'        | 389               |           |
|                | HAN-L-R2 <sup>a</sup>          | 5'-GCR TCR TCW GAR TGR TGD GCA A-3'      |                   |           |
| M segment      | JJ-HTNV-M-F-outer <sup>a</sup> | 5'-TGG AAT GAC AAT GCT CAT GGA GT-3'     | 343               |           |
|                | JJ-HTNV-M-R-outer <sup>a</sup> | 5'-GGA CAA TCT GAT GGA TTA CAA CCC C-3'  |                   |           |
|                | JJ-HTNV-M-F-inner <sup>a</sup> | 5'-CCT ATG CAC ACA GAT TTG GAA CT-3'     | 262               |           |
|                | JJ-HTNV-M-R-inner <sup>a</sup> | 5'-GTT CAT AGT GGC ATT TTG CAG TAT GC-3' |                   |           |
| S segment      | HFRS-S-2F <sup>a</sup>         | 5'-ARA RRT CAR BVC THA GBT AYG-3'        | 1,009             |           |
|                | HFRS-S-2R <sup>a</sup>         | 5'-TGR TTV GAK ATT TCC TTS AC-3'         |                   |           |
|                | HFRS-S2nd-1F <sup>a</sup>      | 5'-GAY ATT GAW GAA CCW ASW GGV C-3'      | 725               |           |
|                | HFRS-S2nd-1R <sup>a</sup>      | 5'-GAH GCC ATK AT GTR TTY CKC-3'         |                   |           |
| S segment      | JJ_HTN_S-229F <sup>b</sup>     | 5'- CTG GCA GAT AGG ATT GCA AC -3'       | 153               |           |
|                | JJ_HTN_S-381R <sup>b</sup>     | 5'- CTG TCC AGT AGG TTC ATC AAT ATC-3'   |                   |           |

<sup>a</sup>: Oligonucleotide primers for reverse transcription-polymerase chain reaction (RT-PCR)

<sup>b</sup>: Oligonucleotide primers for real-time quantitative transcription-polymerase chain reaction (RT-qPCR)

- Kim D, Jalal S, Kim C, Song H, Lee J, Shin M, et al. Geographical clustering of hantavirus isolates from *Apodemus agrarius* identified in the Republic of Korea indicate the emergence of a new hantavirus genotype. [Preprint]. 2020. Available from: <https://www.researchsquare.com/article/rs-12650/v1>.
